# Supplementary material for: Efficient and Stable Catalytic Hydrogen Evolution of ZrO2/CdSe-DETA Nanocomposites under Visible Light
Source: MDPI journal article supplement (doi:10.3390/catal12111385), 2022-11-08
Supplement: s1 [file s1]

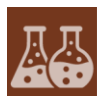

**Table S1.** The amounts of precursors in preparing CdSe-DETA, ZrO<sub>2</sub> and ZO/CS nanocomposites and the BET surface area, average pore size and total pore volume of above materials.

| Samples          | ZrO <sub>2</sub><br>(g) | CdCl <sub>2</sub> ·2.5H <sub>2</sub> O<br>(mmol) | Se<br>(mmol) | BET surface<br>area (m <sup>2</sup> g <sup>-1</sup> ) | Average pore<br>size (nm) | Total pore<br>volume (cm <sup>3</sup> g <sup>-1</sup> ) |
|------------------|-------------------------|--------------------------------------------------|--------------|-------------------------------------------------------|---------------------------|---------------------------------------------------------|
| CdSe-DETA        | 0                       | 1                                                | 1            | 14.87                                                 | 18.8042                   | 0.06626                                                 |
| ZO/CS-0.4        | 0.1                     | 0.4                                              | 0.4          | 13.73                                                 | 19.6798                   | 0.06852                                                 |
| ZO/CS-0.6        | 0.1                     | 0.6                                              | 0.6          | 18.64                                                 | 13.4430                   | 0.04833                                                 |
| ZO/CS-0.8        | 0.1                     | 0.8                                              | 0.8          | 14.97                                                 | 24.4874                   | 0.097095                                                |
| ZrO <sub>2</sub> | /                       | /                                                | /            | 16.41                                                 | 24.9942                   | 0.097077                                                |

**Table S2.** Comparison of photocatalytic H<sub>2</sub> production rate of the catalysts in references and this work.

| Catalyst                                                       | Light source  | Sacrificial agent                                  | H <sub>2</sub> production rate<br>(mmol g <sup>-1</sup> h <sup>-1</sup> ) | Ref.      |
|----------------------------------------------------------------|---------------|----------------------------------------------------|---------------------------------------------------------------------------|-----------|
| WO <sub>3</sub> (H <sub>2</sub> O) <sub>0.333</sub> /CdSe-DETA | 300 W Xe lamp | Na <sub>2</sub> SO <sub>3</sub> +Na <sub>2</sub> S | 2.3                                                                       | 11        |
| CdSe QD/B-rGO/O-gC <sub>3</sub> N <sub>4</sub>                 | 500 W Xe lamp | ascorbic acid                                      | 1.435                                                                     | 14        |
| TiO <sub>2-x</sub>                                             | 150 W Xe lamp | aqueous methanol                                   | 1.166                                                                     | 20        |
| WO <sub>3</sub> /g-C <sub>3</sub> N <sub>4</sub>               | 350 W Xe lamp | lactic acid                                        | 0.982                                                                     | 30        |
| WO <sub>3</sub> /TiO <sub>2</sub>                              | 350 W Xe lamp | aqueous methanol                                   | 0.246                                                                     | 33        |
| CdS/ZnS                                                        | 300 W Xe lamp | Na <sub>2</sub> SO <sub>3</sub> +Na <sub>2</sub> S | 1.238                                                                     | 36        |
| ZrO <sub>2</sub>                                               | 300 W Xe lamp | Na <sub>2</sub> SO <sub>3</sub> +Na <sub>2</sub> S | 1.75                                                                      | This work |
| CdSe-DETA                                                      | 300 W Xe lamp | Na <sub>2</sub> SO <sub>3</sub> +Na <sub>2</sub> S | 4.27                                                                      | This work |

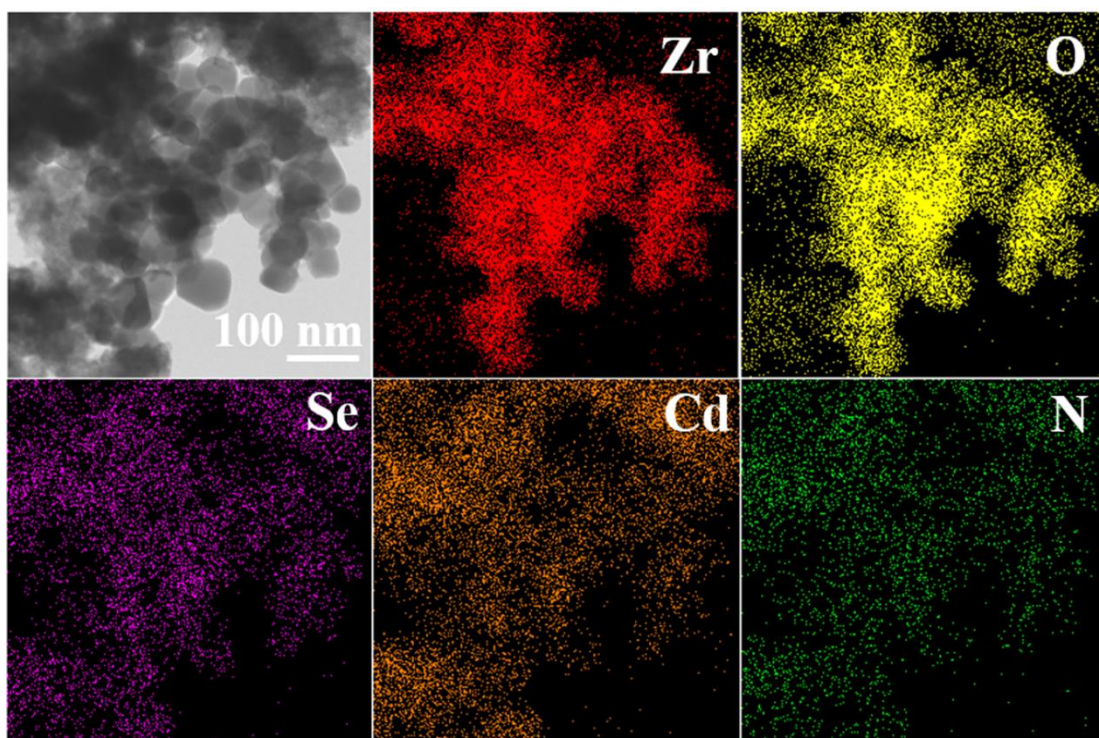

**Figure S1.** HAADF and elemental mapping images of ZO/CS-0.6 nanocomposite.

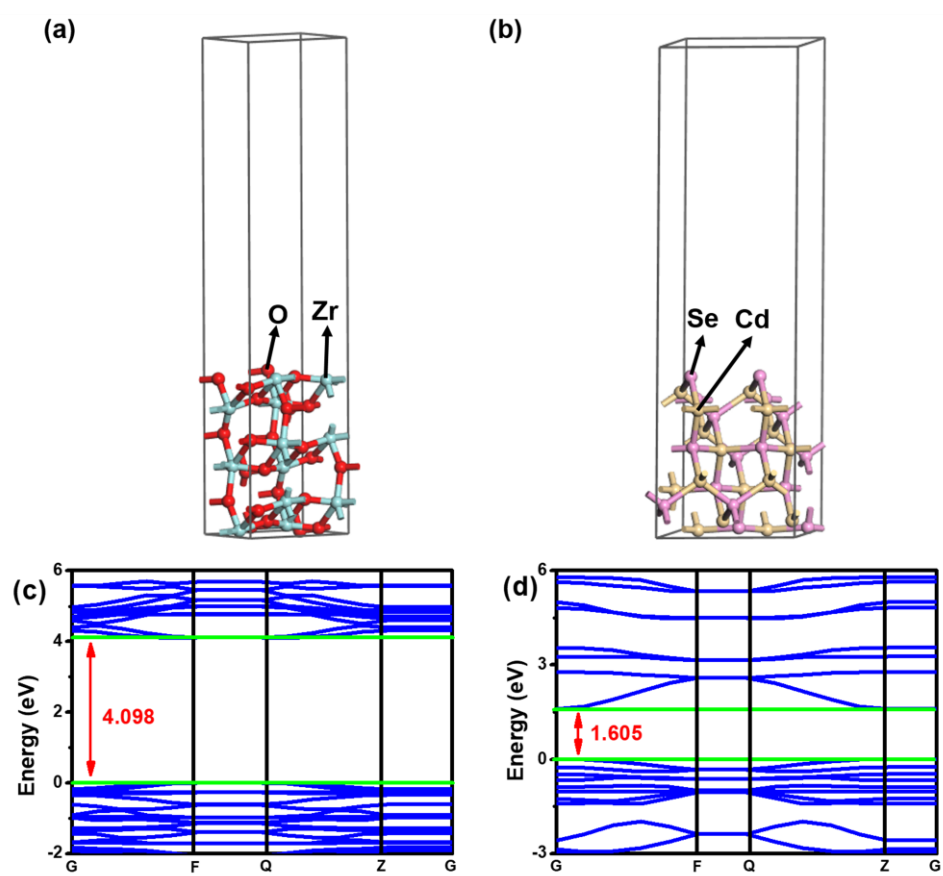

**Figure S2.** Optimized models of (a)  $\text{ZrO}_2$  and (b)  $\text{CdSe}$ . Calculated energy band structures for the (c)  $\text{ZrO}_2$  and (d)  $\text{CdSe}$ .

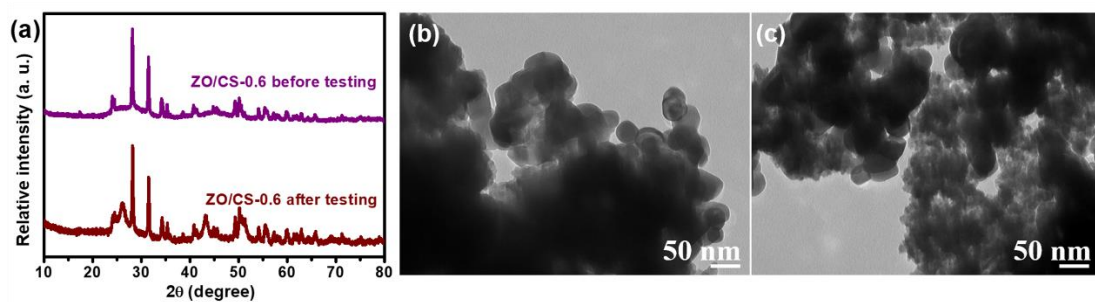

**Figure S3.** (a) XRD patterns of ZO/CS-0.6 nanocomposite before and after cycling test. (b) TEM image ZO/CS-0.6 nanocomposite before cycling test. (c) TEM image ZO/CS-0.6 nanocomposite after cycling test.
